# Supplementary material for: Extreme Growth Failure is a Common Presentation of Ligase IV Deficiency
Source: PubMed Central journal article supplement (PMC3995017; doi:10.1002/humu.22461), 2013-11-08
Supplement: humu0035-0076-sd1.pdf [file humu0035-0076-sd1.pdf]

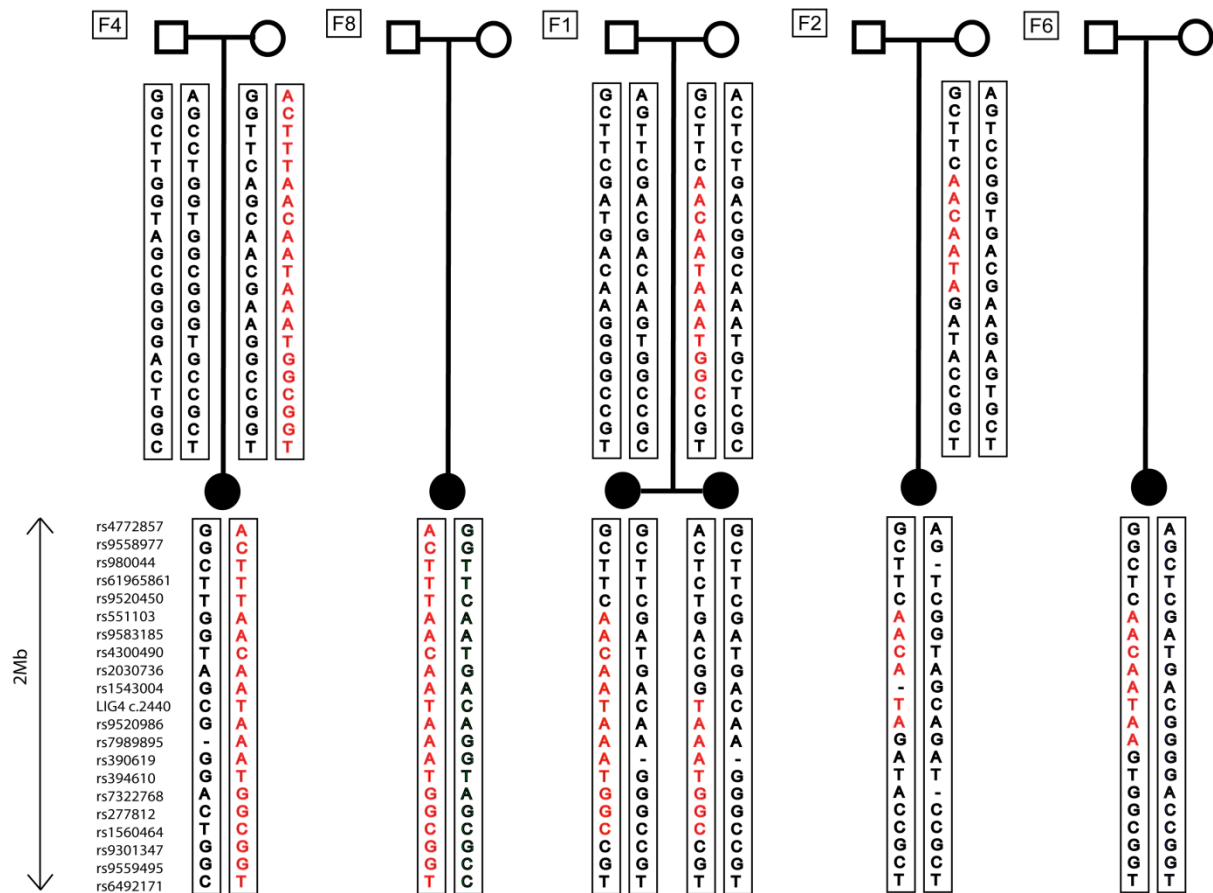

**Supp. Figure S1.** A common 2Mb haplotype is present in two families with the c.2440C>T (p.Arg814\*) mutation, F4 and F8. F1, F2 and F6 also shared a smaller region of identical SNPs adjacent to the LIG4 c.2440C>T mutation, suggesting that the mutation may have the same ancestral origin in these families.
